# Supplementary material for: Microarray Analysis of the Molecular Mechanism Involved in Parkinson's Disease
Source: Parkinsons Dis. 2018 Mar 1;2018:1590465. doi: 10.1155/2018/1590465 (PMC5852864; doi:10.1155/2018/1590465)
Supplement: Supplementary 5 — Table 5: the detailed information about transcription factor- (TF-) target regulatory network. [file 1590465.f5.xlsx]

## Sheet: Sheet1
gene	description	degree		interaction
TFDP1	down/tf	62		GATA3 (pp) AHCYL1
ZBTB7A	up/tf	55		GATA3 (pp) B3GALT2
OVOL1	up/tf	46		GATA3 (pp) BANK1
SMAD1	down/tf	45		GATA3 (pp) BMP6
QSOX1	down/tf	44		GATA3 (pp) CBLB
GATA3	up/tf	38		GATA3 (pp) ENC1
ENC1	down	6		GATA3 (pp) FNDC3A
FNDC3A	up	6		GATA3 (pp) FRK
MID1	down	6		GATA3 (pp) GALNT10
PDE4D	down	5		GATA3 (pp) GREB1L
ZNF362	up	5		GATA3 (pp) GTF2A1
CBLB	down	4		GATA3 (pp) HLA-C
LARGE	up	4		GATA3 (pp) HLF
TRPC4	down	4		GATA3 (pp) ITSN2
CTBP2	up	4		GATA3 (pp) IVNS1ABP
GLI3	down	4		GATA3 (pp) LARGE
SCN3A	up	4		GATA3 (pp) LRRN3
TAL1	down	4		GATA3 (pp) MAPK4
LRRN3	up	3		GATA3 (pp) MAST4
MAST4	up	3		GATA3 (pp) MID1
NPAS3	down	3		GATA3 (pp) MSI1
SPTBN1	up	3		GATA3 (pp) NPAS3
TNPO1	down	3		GATA3 (pp) OTUD7B
ASS1	down	3		GATA3 (pp) PDE3A
ESR1	up	3		GATA3 (pp) PDE4D
GPSM2	up	3		GATA3 (pp) PFAS
SLC7A7	down	3		GATA3 (pp) PROX1
CADM1	down	3		GATA3 (pp) PTN
CCR6	up	3		GATA3 (pp) SEMA3C
DUSP6	down	3		GATA3 (pp) SPTBN1
PLCH1	down	3		GATA3 (pp) ST14
TRAF3IP2	up	3		GATA3 (pp) TLX2
TRPM3	down	3		GATA3 (pp) TNIP3
AHCYL1	up	2		GATA3 (pp) TNPO1
GALNT10	down	2		GATA3 (pp) TRPC4
GREB1L	down	2		GATA3 (pp) TTBK2
HLA-C	down	2		GATA3 (pp) WIPF2
ITSN2	down	2		GATA3 (pp) ZNF362
IVNS1ABP	down	2		OVOL1 (pp) ADCK3
MAPK4	up	2		OVOL1 (pp) AHCYL1
MSI1	up	2		OVOL1 (pp) ASS1
OTUD7B	down	2		OVOL1 (pp) BRD3
PDE3A	down	2		OVOL1 (pp) CTBP2
PROX1	down	2		OVOL1 (pp) CYLD
SEMA3C	down	2		OVOL1 (pp) DSP
TNIP3	down	2		OVOL1 (pp) ENC1
TTBK2	up	2		OVOL1 (pp) ESR1
ADCK3	up	2		OVOL1 (pp) FERMT2
CYLD	up	2		OVOL1 (pp) FNDC3A
FERMT2	up	2		OVOL1 (pp) GLI3
NCOA1	up	2		OVOL1 (pp) GPSM2
NOTCH2	up	2		OVOL1 (pp) HLA-C
OGT	down	2		OVOL1 (pp) IVNS1ABP
SATB2	down	2		OVOL1 (pp) KIF17
SYNJ2	up	2		OVOL1 (pp) KLF7
TRPC5	up	2		OVOL1 (pp) LARGE
ACSBG1	up	2		OVOL1 (pp) LRRN3
ASXL1	down	2		OVOL1 (pp) MAPK4
BFSP1	down	2		OVOL1 (pp) MID1
CD96	up	2		OVOL1 (pp) MSI1
CORO2B	up	2		OVOL1 (pp) NCOA1
DDX6	up	2		OVOL1 (pp) NOP14
DPP4	up	2		OVOL1 (pp) NOTCH2
ETV1	down	2		OVOL1 (pp) NPAS3
H2AFY	down	2		OVOL1 (pp) NUAK1
IL22RA1	down	2		OVOL1 (pp) OGT
KDELR1	down	2		OVOL1 (pp) OTUD7B
MLLT10	down	2		OVOL1 (pp) PDE4D
MR1	down	2		OVOL1 (pp) PPFIBP1
NPY1R	down	2		OVOL1 (pp) RORB
PPP2R3A	up	2		OVOL1 (pp) SATB2
RBM15B	down	2		OVOL1 (pp) SCN3A
SAP30	down	2		OVOL1 (pp) SLA
SH3BP5	down	2		OVOL1 (pp) SLC7A7
SLC6A14	up	2		OVOL1 (pp) SP2
SORT1	down	2		OVOL1 (pp) SPTBN1
TOX	down	2		OVOL1 (pp) SYNCRIP
TPD52	up	2		OVOL1 (pp) SYNJ2
VCAN	down	2		OVOL1 (pp) TCF3
CAMTA1	up	2		OVOL1 (pp) TNIP3
DOCK10	up	2		OVOL1 (pp) TNPO1
HOXC4	down	2		OVOL1 (pp) TRPC5
NEK1	down	2		OVOL1 (pp) TSPAN13
SMG7	down	2		OVOL1 (pp) TTBK2
B3GALT2	up	1		QSOX1 (pp) ACSBG1
BANK1	up	1		QSOX1 (pp) ASS1
BMP6	down	1		QSOX1 (pp) ASXL1
FRK	down	1		QSOX1 (pp) BFSP1
GTF2A1	up	1		QSOX1 (pp) CADM1
HLF	up	1		QSOX1 (pp) CBLB
PFAS	up	1		QSOX1 (pp) CCR6
PTN	down	1		QSOX1 (pp) CD96
ST14	down	1		QSOX1 (pp) CORO2B
TLX2	down	1		QSOX1 (pp) CTBP2
WIPF2	up	1		QSOX1 (pp) DDX6
BRD3	up	1		QSOX1 (pp) DPP4
DSP	up	1		QSOX1 (pp) DUSP6
KIF17	up	1		QSOX1 (pp) ENC1
KLF7	up	1		QSOX1 (pp) ETV1
NOP14	up	1		QSOX1 (pp) FNDC3A
NUAK1	down	1		QSOX1 (pp) GLI3
PPFIBP1	down	1		QSOX1 (pp) GPSM2
RORB	down	1		QSOX1 (pp) H2AFY
SLA	down	1		QSOX1 (pp) IL22RA1
SP2	up	1		QSOX1 (pp) KDELR1
SYNCRIP	down	1		QSOX1 (pp) MAST4
TCF3	up	1		QSOX1 (pp) MID1
TSPAN13	up	1		QSOX1 (pp) MLLT10
AMFR	down	1		QSOX1 (pp) MR1
ANKH	up	1		QSOX1 (pp) NPY1R
ANXA4	down	1		QSOX1 (pp) PDE4D
ATM	up	1		QSOX1 (pp) PLCH1
ATP5G2	up	1		QSOX1 (pp) PPP2R3A
BTG1	down	1		QSOX1 (pp) RBM15B
CA2	down	1		QSOX1 (pp) SAP30
CCR9	up	1		QSOX1 (pp) SCN3A
CHAF1A	down	1		QSOX1 (pp) SH3BP5
DHFR	up	1		QSOX1 (pp) SLC6A14
DHODH	up	1		QSOX1 (pp) SLC7A7
ERCC3	down	1		QSOX1 (pp) SORT1
EZH1	up	1		QSOX1 (pp) TAL1
GNAO1	down	1		QSOX1 (pp) TOX
HPSE	down	1		QSOX1 (pp) TPD52
LRP1	down	1		QSOX1 (pp) TRAF3IP2
MCM4	down	1		QSOX1 (pp) TRPC4
MECOM	down	1		QSOX1 (pp) TRPM3
MYO6	down	1		QSOX1 (pp) VCAN
NR1H4	down	1		QSOX1 (pp) ZNF362
PCNX	down	1		SMAD1 (pp) ACSBG1
PRKDC	down	1		SMAD1 (pp) ASS1
RRM2	down	1		SMAD1 (pp) ASXL1
SART3	up	1		SMAD1 (pp) BFSP1
SBNO1	up	1		SMAD1 (pp) CADM1
SCN8A	up	1		SMAD1 (pp) CBLB
SERBP1	up	1		SMAD1 (pp) CCR6
SPRY2	up	1		SMAD1 (pp) CD96
SSRP1	down	1		SMAD1 (pp) CORO2B
STK38	down	1		SMAD1 (pp) CTBP2
ZCWPW1	up	1		SMAD1 (pp) DDX6
AKAP13	down	1		SMAD1 (pp) DPP4
ARIH1	down	1		SMAD1 (pp) DUSP6
ARRB2	down	1		SMAD1 (pp) ENC1
CBX4	down	1		SMAD1 (pp) ETV1
CD40	up	1		SMAD1 (pp) FNDC3A
CD86	down	1		SMAD1 (pp) GLI3
CIB2	down	1		SMAD1 (pp) GPSM2
CMKLR1	down	1		SMAD1 (pp) H2AFY
DUSP2	down	1		SMAD1 (pp) IL22RA1
EFHD2	down	1		SMAD1 (pp) KDELR1
FANCI	down	1		SMAD1 (pp) MAST4
FKBP5	down	1		SMAD1 (pp) MID1
GFRA2	down	1		SMAD1 (pp) MLLT10
ICAM1	down	1		SMAD1 (pp) MR1
KCNMA1	down	1		SMAD1 (pp) NPY1R
KLF9	down	1		SMAD1 (pp) PDE4D
KYNU	down	1		SMAD1 (pp) PLCH1
LRRFIP2	down	1		SMAD1 (pp) PPP2R3A
MTMR3	down	1		SMAD1 (pp) RBM15B
NFKBIA	down	1		SMAD1 (pp) SAP30
NR1D1	up	1		SMAD1 (pp) SCN3A
PARP11	down	1		SMAD1 (pp) SH3BP5
PLSCR1	down	1		SMAD1 (pp) SLC6A14
PTPRK	up	1		SMAD1 (pp) SLC7A7
SYT11	down	1		SMAD1 (pp) SORT1
TNFAIP3	down	1		SMAD1 (pp) TAL1
TSPAN31	up	1		SMAD1 (pp) TOX
				SMAD1 (pp) TPD52
				SMAD1 (pp) TRAF3IP2
				SMAD1 (pp) TRPC4
				SMAD1 (pp) TRPM3
				SMAD1 (pp) VCAN
				SMAD1 (pp) ZNF362
				TFDP1 (pp) AMFR
				TFDP1 (pp) ANKH
				TFDP1 (pp) ANXA4
				TFDP1 (pp) ATM
				TFDP1 (pp) ATP5G2
				TFDP1 (pp) BTG1
				TFDP1 (pp) CA2
				TFDP1 (pp) CAMTA1
				TFDP1 (pp) CBLB
				TFDP1 (pp) CCR6
				TFDP1 (pp) CCR9
				TFDP1 (pp) CHAF1A
				TFDP1 (pp) CTBP2
				TFDP1 (pp) DHFR
				TFDP1 (pp) DHODH
				TFDP1 (pp) DOCK10
				TFDP1 (pp) ENC1
				TFDP1 (pp) ERCC3
				TFDP1 (pp) ESR1
				TFDP1 (pp) EZH1
				TFDP1 (pp) FNDC3A
				TFDP1 (pp) GALNT10
				TFDP1 (pp) GLI3
				TFDP1 (pp) GNAO1
				TFDP1 (pp) GREB1L
				TFDP1 (pp) HOXC4
				TFDP1 (pp) HPSE
				TFDP1 (pp) LARGE
				TFDP1 (pp) LRP1
				TFDP1 (pp) LRRN3
				TFDP1 (pp) MCM4
				TFDP1 (pp) MECOM
				TFDP1 (pp) MID1
				TFDP1 (pp) MYO6
				TFDP1 (pp) NEK1
				TFDP1 (pp) NOTCH2
				TFDP1 (pp) NPAS3
				TFDP1 (pp) NR1H4
				TFDP1 (pp) PCNX
				TFDP1 (pp) PDE3A
				TFDP1 (pp) PDE4D
				TFDP1 (pp) PRKDC
				TFDP1 (pp) PROX1
				TFDP1 (pp) RRM2
				TFDP1 (pp) SART3
				TFDP1 (pp) SATB2
				TFDP1 (pp) SBNO1
				TFDP1 (pp) SCN3A
				TFDP1 (pp) SCN8A
				TFDP1 (pp) SERBP1
				TFDP1 (pp) SMAD1
				TFDP1 (pp) SMG7
				TFDP1 (pp) SPRY2
				TFDP1 (pp) SSRP1
				TFDP1 (pp) STK38
				TFDP1 (pp) TAL1
				TFDP1 (pp) TFDP1
				TFDP1 (pp) TRPC4
				TFDP1 (pp) TRPC5
				TFDP1 (pp) ZBTB7A
				TFDP1 (pp) ZCWPW1
				TFDP1 (pp) ZNF362
				ZBTB7A (pp) ADCK3
				ZBTB7A (pp) AKAP13
				ZBTB7A (pp) ARIH1
				ZBTB7A (pp) ARRB2
				ZBTB7A (pp) CADM1
				ZBTB7A (pp) CAMTA1
				ZBTB7A (pp) CBX4
				ZBTB7A (pp) CD40
				ZBTB7A (pp) CD86
				ZBTB7A (pp) CIB2
				ZBTB7A (pp) CMKLR1
				ZBTB7A (pp) CYLD
				ZBTB7A (pp) DOCK10
				ZBTB7A (pp) DUSP2
				ZBTB7A (pp) DUSP6
				ZBTB7A (pp) EFHD2
				ZBTB7A (pp) ENC1
				ZBTB7A (pp) ESR1
				ZBTB7A (pp) FANCI
				ZBTB7A (pp) FERMT2
				ZBTB7A (pp) FKBP5
				ZBTB7A (pp) FNDC3A
				ZBTB7A (pp) GFRA2
				ZBTB7A (pp) HOXC4
				ZBTB7A (pp) ICAM1
				ZBTB7A (pp) ITSN2
				ZBTB7A (pp) KCNMA1
				ZBTB7A (pp) KLF9
				ZBTB7A (pp) KYNU
				ZBTB7A (pp) LARGE
				ZBTB7A (pp) LRRFIP2
				ZBTB7A (pp) MID1
				ZBTB7A (pp) MTMR3
				ZBTB7A (pp) NCOA1
				ZBTB7A (pp) NEK1
				ZBTB7A (pp) NFKBIA
				ZBTB7A (pp) NR1D1
				ZBTB7A (pp) OGT
				ZBTB7A (pp) PARP11
				ZBTB7A (pp) PLCH1
				ZBTB7A (pp) PLSCR1
				ZBTB7A (pp) PTPRK
				ZBTB7A (pp) SEMA3C
				ZBTB7A (pp) SMG7
				ZBTB7A (pp) SPTBN1
				ZBTB7A (pp) SYNJ2
				ZBTB7A (pp) SYT11
				ZBTB7A (pp) TAL1
				ZBTB7A (pp) TNFAIP3
				ZBTB7A (pp) TNPO1
				ZBTB7A (pp) TRAF3IP2
				ZBTB7A (pp) TRPM3
				ZBTB7A (pp) TSPAN31
				ZBTB7A (pp) ZNF362
